# Supplementary material for: Comprehensive Investigation of Ginsenosides in the Steamed Panax quinquefolius with Different Processing Conditions Using LC-MS
Source: Molecules. 2024 Jan 28;29(3):623. doi: 10.3390/molecules29030623 (PMC10856252; doi:10.3390/molecules29030623)
Supplement: Supplementary file 1 [file molecules-29-00623-s001.zip › Supplementary Table S1-S2.xlsx]

## Sheet: Table S1
Table S1. The p and ratio of differential ginsenosides in the samples with different steaming time.
Compounds name	Freeze-dried/2 h		Freeze-dried/4 h		Freeze-dried/6 h		Freeze-dried/8 h		Freeze-dried/10 h		Freeze-dried/12 h		2 h/4 h		2 h/6 h		2 h/8 h		2 h/10 h		2 h/12 h		4 h/6 h		4 h/8 h		4 h/10 h		4 h/12 h		6 h/8 h		6 h/10 h		6 h/12 h		8 h/10 h		8 h/12 h		10 h/12 h
	p	Ratio	p	Ratio	p	Ratio	p	Ratio	p	Ratio	p	Ratio	p	Ratio	p	Ratio	p	Ratio	p	Ratio	p	Ratio	p	Ratio	p	Ratio	p	Ratio	p	Ratio	p	Ratio	p	Ratio	p	Ratio	p	Ratio	p	Ratio	p	Ratio
		2 h/Freeze-dried		4 h/Freeze-dried		6 h/Freeze-dried		8 h/Freeze-dried		10 h/Freeze-dried		12 h/Freeze-dried		4 h/2 h		6 h/2 h		8 h/2 h		10 h/2 h		12 h/2 h		6 h/4 h		8 h/4 h		10 h/4 h		12 h/4 h		8 h/6 h		10 h/6 h		12 h/6 h		10 h/8 h		12 h/8 h		12 h/10 h
Ginsenoside F1	<0.05	1.5782	<0.05	2.71792	<0.05	6.43251	<0.05	3.10829	<0.05	3.48992	<0.05	4.72731	<0.05	1.72216	<0.05	4.07585	<0.05	1.96951	<0.05	2.21133	<0.05	2.99538	<0.05	2.36671	<0.05	1.14363	<0.05	1.28404	<0.05	1.73932	<0.05	0.483216	<0.05	0.542544	<0.05	0.73491	<0.05	1.12278	<0.05	1.52087	<0.05	1.35456
Ginsenoside F3	<0.05	11.647	<0.05	19.6404	<0.05	32.7653	<0.05	44.4698	<0.05	86.2622	<0.05	67.5398	<0.05	1.68631	<0.05	2.8132	<0.05	3.81814	<0.05	7.40641	<0.05	5.79892	<0.05	1.66826	<0.05	2.2642	<0.05	4.39208	<0.05	3.43882	<0.05	1.35722	<0.05	2.63273	<0.05	2.06132	<0.05	1.9398	<0.05	1.51878	<0.05	0.782959
Ginsenoside La	<0.05	8.88165	<0.05	22.4911	<0.05	35.2309	<0.05	40.9889	<0.05	43.2786	<0.05	60.1645	<0.05	2.53231	<0.05	3.9667	<0.05	4.61501	<0.05	4.87281	<0.05	6.77402	<0.05	1.56644	<0.05	1.82245	<0.05	1.92426	<0.05	2.67504	<0.05	1.16344	<0.05	1.22843	<0.05	1.70772	\	1.05586	<0.05	1.46782	<0.05	1.39017
Ginsenoside Pk3	<0.05	88.1158	<0.05	253.373	<0.05	571.103	<0.05	548.215	<0.05	683.238	<0.05	1367.65	<0.05	2.87546	<0.05	6.48128	<0.05	6.22152	<0.05	7.75386	<0.05	15.5211	<0.05	2.254	<0.05	2.16367	<0.05	2.69657	<0.05	5.39779	<0.05	0.959922	<0.05	1.19635	<0.05	2.39476	<0.05	1.2463	<0.05	2.49474	<0.05	2.00173
Ginsenoside Rb2	<0.05	2.90714	<0.05	3.37693	<0.05	3.65381	<0.05	5.66792	<0.05	2.87592	<0.05	3.01309	<0.05	1.1616	<0.05	1.25684	<0.05	1.26169	\	0.989258	\	1.03644	<0.05	1.08199	<0.05	1.08617	<0.05	0.851636	<0.05	0.892257	\	1.00386	<0.05	0.7871	<0.05	0.824643	<0.05	0.784073	<0.05	0.821471	<0.05	1.0477
Ginsenoside Rb3	<0.05	3.63675	<0.05	5.69069	<0.05	7.034	<0.05	7.13661	<0.05	6.69552	<0.05	7.29041	<0.05	1.56478	<0.05	1.93415	<0.05	1.96236	<0.05	1.84107	<0.05	2.00465	<0.05	1.23605	<0.05	1.25408	<0.05	1.17657	<0.05	1.28111	\	1.01459	<0.05	0.951879	<0.05	1.03645	<0.05	0.938193	<0.05	1.02155	<0.05	1.08885
Ginsenoside Re1	<0.05	0.278091	<0.05	0.324767	<0.05	0.308388	<0.05	0.237364	<0.05	0.164962	<0.05	0.167868	<0.05	1.16784	<0.05	1.10895	<0.05	0.853547	<0.05	0.593193	<0.05	0.603645	<0.05	0.949567	<0.05	0.730874	<0.05	0.507939	<0.05	0.516889	<0.05	0.769692	<0.05	0.534917	<0.05	0.544341	<0.05	0.694975	<0.05	0.70722	\	1.01762
Ginsenoside Re4	<0.05	0.63305	<0.05	0.581374	<0.05	0.409014	<0.05	0.403633	<0.05	0.233305	<0.05	0.152266	<0.05	0.91837	<0.05	0.646102	<0.05	0.637602	<0.05	0.368542	<0.05	0.240527	<0.05	0.703531	<0.05	0.694275	<0.05	0.4013	<0.05	0.261907	\	0.986844	<0.05	0.570408	<0.05	0.372275	<0.05	0.578013	<0.05	0.377237	<0.05	0.652645
Ginsenoside Rg5	<0.05	121.575	<0.05	233.62	<0.05	321.714	<0.05	489.973	<0.05	541.899	<0.05	592.518	<0.05	1.92162	<0.05	2.64623	<0.05	4.03023	<0.05	4.45734	<0.05	4.8737	<0.05	1.37708	<0.05	2.09731	<0.05	2.31957	<0.05	2.53624	<0.05	1.52301	<0.05	1.68441	<0.05	1.84175	<0.05	1.10598	<0.05	1.20929	<0.05	1.09341
Ginsenoside Rg5 isomer I	<0.05	177.733	<0.05	315.789	<0.05	333.296	<0.05	507.612	<0.05	561.408	<0.05	613.848	<0.05	1.9908	<0.05	2.74149	<0.05	4.17532	<0.05	4.61781	<0.05	5.04915	<0.05	1.33485	<0.05	1.95799	<0.05	2.13197	<0.05	2.29221	<0.05	1.51963	<0.05	1.65466	<0.05	1.77903	<0.05	1.12806	<0.05	1.21284	<0.05	1.11387
Ginsenoside Rg5 isomer II	<0.05	178.792	<0.05	315.726	<0.05	406.802	<0.05	596.707	<0.05	649.729	<0.05	698.563	<0.05	1.76588	<0.05	2.27528	<0.05	3.33743	<0.05	3.63399	<0.05	3.90712	<0.05	1.28846	<0.05	1.88995	<0.05	2.05789	<0.05	2.21256	<0.05	1.46683	<0.05	1.59716	<0.05	1.71721	<0.05	1.08886	<0.05	1.1707	<0.05	1.07516
Ginsenoside Rg6	<0.05	24.46	<0.05	48.675	<0.05	73.5207	<0.05	75.6024	<0.05	81.4136	<0.05	91.6255	<0.05	1.98999	<0.05	3.00576	<0.05	3.09086	<0.05	3.32844	<0.05	3.74594	<0.05	1.51044	<0.05	1.55321	<0.05	1.67259	<0.05	1.88239	\	1.02831	<0.05	1.10736	<0.05	1.24625	<0.05	1.07686	<0.05	1.21194	<0.05	1.12543
Ginsenoside Rg6 isomer I	<0.05	76.596	<0.05	325.621	<0.05	644.652	<0.05	722.426	<0.05	847.8	<0.05	1037.39	<0.05	4.25115	<0.05	8.41626	<0.05	9.43164	<0.05	11.0685	<0.05	13.5436	<0.05	1.97976	<0.05	2.21861	<0.05	2.60364	<0.05	3.18588	<0.05	1.12065	<0.05	1.31513	<0.05	1.60922	<0.05	1.17354	<0.05	1.43598	<0.05	1.22363
Ginsenoside Rg6 isomer II	<0.05	44.8774	<0.05	101.354	<0.05	173.955	<0.05	173.914	<0.05	202.278	<0.05	238.319	<0.05	2.25846	<0.05	3.87624	<0.05	3.87531	<0.05	4.50734	<0.05	5.31044	<0.05	1.71632	<0.05	1.71591	<0.05	1.99576	<0.05	2.35136	\	0.999762	<0.05	1.16282	<0.05	1.37	<0.05	1.16309	<0.05	1.37033	<0.05	1.17818
Ginsenoside Rh1 isomer	<0.05	3.08546	<0.05	13.2425	<0.05	41.1265	<0.05	54.7823	<0.05	89.921	<0.05	233.01	<0.05	4.29192	<0.05	13.3291	<0.05	17.755	<0.05	29.1435	<0.05	75.5187	<0.05	3.10563	<0.05	4.13684	<0.05	6.79031	<0.05	17.5956	<0.05	1.33204	<0.05	2.18645	<0.05	5.66569	<0.05	1.64142	<0.05	4.25338	<0.05	2.59128
Ginsenoside Rh15	<0.05	21.5939	<0.05	54.5347	<0.05	84.6209	<0.05	107.17	<0.05	109.281	<0.05	150.357	<0.05	2.52546	<0.05	3.91874	<0.05	4.96298	<0.05	5.06074	<0.05	6.96292	<0.05	1.55169	<0.05	1.96518	<0.05	2.00388	<0.05	2.75709	<0.05	1.26647	<0.05	1.29142	<0.05	1.77683	\	1.0197	<0.05	1.40297	<0.05	1.37587
Ginsenoside Rh16	<0.05	15.0805	<0.05	26.5613	<0.05	58.2743	<0.05	68.6142	<0.05	55.7081	<0.05	59.4783	<0.05	1.7613	<0.05	3.86423	<0.05	4.54988	<0.05	3.69406	<0.05	3.94407	<0.05	2.19396	<0.05	2.58325	<0.05	2.09734	<0.05	2.23929	<0.05	1.17744	<0.05	0.955963	\	1.02066	<0.05	0.811902	<0.05	0.866851	<0.05	1.06768
Ginsenoside Rh4	<0.05	74.5537	<0.05	219.601	<0.05	494.157	<0.05	480.126	<0.05	596.384	<0.05	1115.8	<0.05	2.94553	<0.05	6.6282	<0.05	6.44	<0.05	7.99939	<0.05	14.9664	<0.05	2.25025	<0.05	2.18636	<0.05	2.71577	<0.05	5.08105	\	0.971607	<0.05	1.20687	<0.05	2.25799	<0.05	1.24214	<0.05	2.32398	<0.05	1.87094
Ginsenoside Rs4	<0.05	240.571	<0.05	548.501	<0.05	729.311	<0.05	1443.01	<0.05	1729.91	<0.05	1819.2	<0.05	2.28	<0.05	3.03158	<0.05	5.99828	<0.05	7.19086	<0.05	7.56201	<0.05	1.32964	<0.05	2.63083	<0.05	3.15389	<0.05	3.31667	<0.05	1.9786	<0.05	2.37198	<0.05	2.49441	<0.05	1.19882	<0.05	1.2607	<0.05	1.05161
11-Oxomogroside II A1	<0.05	4.5193	<0.05	10.4536	<0.05	20.1155	<0.05	19.1508	<0.05	21.3666	<0.05	29.1448	<0.05	2.31309	<0.05	4.45101	<0.05	4.23757	<0.05	4.72785	<0.05	6.44896	<0.05	1.92427	<0.05	1.83199	<0.05	2.04395	<0.05	2.78803	<0.05	0.952046	<0.05	1.0622	<0.05	1.44888	<0.05	1.1157	<0.05	1.52186	<0.05	1.36404
20(R)-5,6-Didehydroginsenoside Rg3	<0.05	3.65516	<0.05	4.83471	<0.05	6.66055	<0.05	13.0904	<0.05	14.338	<0.05	13.9783	<0.05	1.32271	<0.05	1.82223	<0.05	3.58134	<0.05	3.92268	<0.05	3.82428	<0.05	1.37765	<0.05	2.70758	<0.05	2.96564	<0.05	2.89125	<0.05	1.96536	<0.05	2.15268	<0.05	2.09868	\	1.09531	\	1.06783	\	0.974915
20(R)-Ginsenoside Rg2	<0.05	17.1558	<0.05	32.3538	<0.05	45.6353	<0.05	47.5166	<0.05	50.9876	<0.05	55.2648	<0.05	1.88588	<0.05	2.66005	<0.05	2.76971	<0.05	2.97203	<0.05	3.22135	<0.05	1.41051	<0.05	1.46866	<0.05	1.57594	<0.05	1.70814	<0.05	1.04123	<0.05	1.11728	<0.05	1.21101	<0.05	1.07305	<0.05	1.16306	<0.05	1.08389
20(R)-Ginsenoside Rh1	<0.05	33.6371	<0.05	91.0683	<0.05	197.403	<0.05	187.015	<0.05	234.529	<0.05	422.411	<0.05	2.70738	<0.05	5.86862	<0.05	5.55979	<0.05	6.97233	<0.05	12.5579	<0.05	2.16764	<0.05	2.05357	<0.05	2.57531	<0.05	4.63839	<0.05	0.947376	<0.05	1.18807	<0.05	2.13983	<0.05	1.25406	<0.05	2.2587	<0.05	1.8011
20(R)-Ginsenoside Rh12	<0.05	2.01666	<0.05	6.16904	<0.05	17.9064	<0.05	28.2597	<0.05	51.6457	<0.05	137.846	<0.05	3.05904	<0.05	8.87924	<0.05	14.0132	<0.05	25.6096	<0.05	68.3538	<0.05	2.90263	<0.05	4.5809	<0.05	8.37176	<0.05	22.3449	<0.05	1.57819	<0.05	2.8842	<0.05	7.69816	<0.05	1.82754	<0.05	4.87783	<0.05	2.66908
20(R)-Ginsenoside Rh2	<0.05	13.8921	<0.05	21.2669	<0.05	62.8688	<0.05	88.827	<0.05	89.72	<0.05	108.873	<0.05	1.53086	<0.05	4.5255	<0.05	6.39406	<0.05	6.45834	<0.05	7.83704	<0.05	2.95618	<0.05	4.17678	<0.05	4.21877	<0.05	5.11937	<0.05	1.4129	<0.05	1.4271	<0.05	1.73175	\	1.01005	<0.05	1.22568	<0.05	1.21348
20(R)-Gypenoside XIII	<0.05	1.97347	<0.05	3.23293	<0.05	5.86115	<0.05	5.78133	<0.05	5.59739	<0.05	6.41402	<0.05	1.6382	<0.05	2.96997	<0.05	2.92952	<0.05	2.83632	<0.05	3.25013	<0.05	1.81295	<0.05	1.78826	<0.05	1.73137	<0.05	1.98397	\	0.986381	\	0.954998	<0.05	1.09433	\	0.968184	<0.05	1.10944	<0.05	1.1459
20(S)-5,6-Didehydroginsenoside Rg3	<0.05	12.3454	<0.05	30.8847	<0.05	57.8956	<0.05	73.0776	<0.05	93.2698	<0.05	135.571	<0.05	2.50173	<0.05	4.68967	<0.05	5.91944	<0.05	7.55506	<0.05	10.9815	<0.05	1.87457	<0.05	2.36614	<0.05	3.01994	<0.05	4.38957	<0.05	1.26223	<0.05	1.611	<0.05	2.34164	<0.05	1.27631	<0.05	1.85516	<0.05	1.45353
20(S)-Ginsenoside Rg3	<0.05	6.07589	<0.05	16.1658	<0.05	34.5774	<0.05	35.3148	<0.05	40.2734	<0.05	59.2166	<0.05	2.66065	<0.05	5.69092	<0.05	5.81229	<0.05	6.62839	<0.05	9.74616	<0.05	2.13892	<0.05	2.18454	<0.05	2.49127	<0.05	3.66308	\	1.02133	<0.05	1.16473	<0.05	1.71258	<0.05	1.14041	<0.05	1.67682	<0.05	1.47037
20(S)-Ginsenoside Rh1	<0.05	1.94026	<0.05	3.36541	<0.05	4.71106	<0.05	4.46106	<0.05	4.96964	<0.05	8.12001	<0.05	1.73452	<0.05	2.42806	<0.05	2.29921	<0.05	2.56133	<0.05	4.18502	<0.05	1.39985	<0.05	1.32556	<0.05	1.47668	<0.05	2.41279	<0.05	0.946933	<0.05	1.05489	<0.05	1.7236	<0.05	1.114	<0.05	1.8202	<0.05	1.63393
20(S)-Ginsenoside Rh12	<0.05	3.41927	<0.05	14.314	<0.05	42.542	<0.05	58.4274	<0.05	100.284	<0.05	249.327	<0.05	4.18628	<0.05	12.4419	<0.05	17.0877	<0.05	29.3291	<0.05	72.9182	<0.05	2.97206	<0.05	4.08183	<0.05	7.006	<0.05	17.4184	<0.05	1.3734	<0.05	2.35729	<0.05	5.86072	<0.05	1.71639	<0.05	4.26729	<0.05	2.48621
20(S)-Gypenoside XIII	<0.05	0.314987	<0.05	0.509738	<0.05	0.708766	<0.05	1.31639	<0.05	1.51436	<0.05	1.83749	<0.05	1.61828	<0.05	2.25015	<0.05	4.17918	<0.05	4.80768	<0.05	5.83355	<0.05	1.39045	<0.05	2.58248	<0.05	2.97085	<0.05	3.60477	<0.05	1.85729	<0.05	2.13661	<0.05	2.59252	<0.05	1.15039	<0.05	1.39586	<0.05	1.21338
5,6-Didehydroginsenoside Rd	<0.05	3.0871	<0.05	3.72197	<0.05	6.04877	<0.05	4.91499	<0.05	5.0326	<0.05	5.67593	<0.05	1.20565	<0.05	1.95937	<0.05	1.5921	<0.05	1.6302	<0.05	1.83859	<0.05	1.62515	<0.05	1.32053	<0.05	1.35213	<0.05	1.52498	<0.05	0.812561	<0.05	0.832004	<0.05	0.938361	\	1.02393	<0.05	1.15482	<0.05	1.12783
Acetyl-20(R)-Ginsenoside Rg1	<0.05	0.184893	<0.05	0.252148	<0.05	0.184325	<0.05	0.183074	<0.05	0.136032	<0.05	0.193539	<0.05	1.36376	\	0.996931	\	0.990166	<0.05	0.735734	<0.05	1.04676	<0.05	0.731019	<0.05	0.726058	<0.05	0.539492	<0.05	0.767558	\	0.993215	<0.05	0.738	<0.05	1.04998	<0.05	0.743042	<0.05	1.05716	<0.05	1.42274
Acetyl-20(R)-Ginsenoside Rg2	<0.05	0.155687	<0.05	0.204047	<0.05	0.149393	<0.05	0.146401	<0.05	0.108835	<0.05	0.165254	<0.05	1.31062	<0.05	0.95957	<0.05	0.940352	<0.05	0.699063	<0.05	1.06145	<0.05	0.732149	<0.05	0.717485	<0.05	0.533383	<0.05	0.809883	\	0.979972	<0.05	0.728517	<0.05	1.10617	<0.05	0.743406	<0.05	1.12878	<0.05	1.51839
Acetyl-20(S)-Ginsenoside Rg1	<0.05	0.0975024	<0.05	0.127946	<0.05	0.0961258	<0.05	0.0907302	<0.05	0.0693254	<0.05	0.0999248	<0.05	1.31223	\	0.985881	<0.05	0.930543	<0.05	0.711012	\	1.02484	<0.05	0.751302	<0.05	0.709131	<0.05	0.541835	<0.05	0.780994	<0.05	0.943869	<0.05	0.721195	<0.05	1.03952	<0.05	0.764083	<0.05	1.10134	<0.05	1.44139
Acetyl-Ginsenoside Rb1	<0.05	4.46062	<0.05	5.11777	<0.05	4.40684	<0.05	5.14715	<0.05	4.74173	<0.05	4.51392	<0.05	1.14732	\	0.987944	<0.05	1.15391	<0.05	1.06302	\	1.01195	<0.05	0.861087	\	1.00574	<0.05	0.926523	<0.05	0.882009	<0.05	1.16799	<0.05	1.07599	\	1.0243	<0.05	0.921234	<0.05	0.876974	\	0.951956
Acetyl-Ginsenoside Rb1 isomer I	<0.05	5.36077	<0.05	5.14212	<0.05	3.59493	<0.05	5.16076	<0.05	4.47117	<0.05	3.24906	<0.05	0.959214	<0.05	0.6706	\	0.96269	<0.05	0.834055	<0.05	0.606081	<0.05	0.699114	\	1.00362	<0.05	0.869519	<0.05	0.631852	<0.05	1.43556	<0.05	1.24374	<0.05	0.903789	<0.05	0.86638	<0.05	0.629571	<0.05	0.726668
Acetyl-Ginsenoside Rb1 isomer II	<0.05	15.6609	<0.05	17.3574	<0.05	13.2204	<0.05	18.6958	<0.05	17.4677	<0.05	13.8768	<0.05	1.10833	<0.05	0.844169	<0.05	1.19379	<0.05	1.11537	<0.05	0.886081	<0.05	0.76166	<0.05	1.0771	\	1.00635	<0.05	0.799475	<0.05	1.41416	<0.05	1.32126	<0.05	1.04965	<0.05	0.934313	<0.05	0.742244	<0.05	0.794428
Acetyl-Ginsenoside Rb3	<0.05	8.29159	<0.05	9.4812	<0.05	7.72591	<0.05	8.34048	<0.05	6.03086	<0.05	5.14422	<0.05	1.14347	<0.05	0.931776	\	1.0059	<0.05	0.727346	<0.05	0.620414	<0.05	0.814865	<0.05	0.879686	<0.05	0.636085	<0.05	0.54257	<0.05	1.07955	<0.05	0.780602	<0.05	0.66584	<0.05	0.723082	<0.05	0.616777	<0.05	0.852983
Acetyl-Ginsenoside Rc	<0.05	11.0232	<0.05	13.4548	<0.05	11.2809	<0.05	13.4608	<0.05	10.2525	<0.05	9.08497	<0.05	1.2206	<0.05	1.02338	<0.05	1.22114	<0.05	0.93009	<0.05	0.824171	<0.05	0.838427	\	1.00044	<0.05	0.761995	<0.05	0.675219	<0.05	1.19324	<0.05	0.908839	<0.05	0.80534	<0.05	0.761659	<0.05	0.674921	<0.05	0.88612
Acetyl-Ginsenoside Rd	<0.05	26.0358	<0.05	22.8213	<0.05	26.1345	<0.05	27.0457	<0.05	30.3939	<0.05	23.4544	<0.05	0.876535	\	1.00379	\	1.03879	<0.05	1.16739	<0.05	0.900853	<0.05	1.14518	<0.05	1.18511	<0.05	1.33182	<0.05	1.02774	\	1.03486	<0.05	1.16298	<0.05	0.897449	<0.05	1.1238	<0.05	0.867214	<0.05	0.771682
Acetyl-Ginsenoside Rd isomer I	<0.05	23.3245	<0.05	19.714	<0.05	24.1174	<0.05	24.3367	<0.05	28.675	<0.05	19.9089	<0.05	0.845205	\	1.03399	\	1.04339	<0.05	1.22939	<0.05	0.853559	<0.05	1.22336	<0.05	1.23449	<0.05	1.45455	\	1.00988	\	1.00909	<0.05	1.18898	<0.05	0.825499	<0.05	1.17826	<0.05	0.818061	<0.05	0.694294
Acetyl-Ginsenoside Rg3	<0.05	0.289538	<0.05	0.880067	\	1.00247	<0.05	1.48943	<0.05	2.83227	<0.05	2.45727	<0.05	3.03956	<0.05	3.46232	<0.05	5.14416	<0.05	9.78205	<0.05	8.48688	<0.05	1.13909	<0.05	1.69241	<0.05	3.21825	<0.05	2.79214	<0.05	1.48575	<0.05	2.82529	<0.05	2.45121	<0.05	1.90158	<0.05	1.64981	<0.05	0.867597
Acetyl-PPD-O-glc/O-glc	<0.05	4.66236	<0.05	3.21855	<0.05	1.80747	<0.05	1.15977	<0.05	0.497188	<0.05	0.177789	<0.05	0.690326	<0.05	0.387672	<0.05	0.248753	<0.05	0.106639	<0.05	0.0381328	<0.05	0.561578	<0.05	0.360341	<0.05	0.154476	<0.05	0.0552388	<0.05	0.641658	<0.05	0.275075	<0.05	0.0983635	<0.05	0.428694	<0.05	0.153296	<0.05	0.357588
Acetyl-PQ-ginsenoside D	<0.05	26.8837	<0.05	48.508	<0.05	58.4935	<0.05	85.1249	<0.05	94.5512	<0.05	95.4577	<0.05	1.80436	<0.05	2.1758	<0.05	3.16641	<0.05	3.51704	<0.05	3.55076	<0.05	1.20585	<0.05	1.75486	<0.05	1.94919	<0.05	1.96788	<0.05	1.45529	<0.05	1.61644	<0.05	1.63194	<0.05	1.11073	<0.05	1.12138	\	1.00959
Chikusetsusaponin FK1	<0.05	0.175438	<0.05	0.115709	<0.05	0.149511	<0.05	0.196729	<0.05	0.155677	<0.05	0.138901	<0.05	0.659545	<0.05	0.852211	<0.05	1.12136	<0.05	0.887357	<0.05	0.791736	<0.05	1.29212	<0.05	1.7002	<0.05	1.34541	<0.05	1.20043	<0.05	1.31582	<0.05	1.04124	<0.05	0.929038	<0.05	0.791324	<0.05	0.706051	<0.05	0.892241
Chikusetsusaponin Iva	<0.05	0.0999552	<0.05	0.161281	<0.05	0.256839	<0.05	0.269402	<0.05	0.35784	<0.05	0.348068	<0.05	1.61354	<0.05	2.56954	<0.05	2.69522	<0.05	3.58001	<0.05	3.48224	<0.05	1.59249	<0.05	1.67038	<0.05	2.21873	<0.05	2.15814	\	1.04891	<0.05	1.39325	<0.05	1.3552	<0.05	1.32828	<0.05	1.292	\	0.972691
Chikusetsusaponin Iva isomer I	<0.05	0.0726626	<0.05	0.118359	<0.05	0.159595	<0.05	0.140264	<0.05	0.22612	<0.05	0.224324	<0.05	1.62889	<0.05	2.19639	<0.05	1.93034	<0.05	3.11192	<0.05	3.0872	<0.05	1.3484	<0.05	1.18507	<0.05	1.91045	<0.05	1.89528	<0.05	0.878872	<0.05	1.41683	<0.05	1.40558	<0.05	1.61211	<0.05	1.5993	\	0.992057
Floralginsenoside Tb	<0.05	9.33564	<0.05	16.6875	<0.05	26.6544	<0.05	63.7489	<0.05	52.7464	<0.05	69.534	<0.05	1.7875	<0.05	2.85512	<0.05	6.82855	<0.05	5.65001	<0.05	7.44823	<0.05	1.59727	<0.05	3.82016	<0.05	3.16084	<0.05	4.16684	<0.05	2.39168	<0.05	1.9789	<0.05	2.60873	<0.05	0.82741	<0.05	1.09075	<0.05	1.31827
Gypenoside IX	<0.05	0.192146	<0.05	0.213029	<0.05	0.458889	<0.05	0.241639	<0.05	0.177335	<0.05	0.178813	\	1.10868	<0.05	2.38823	<0.05	1.25758	<0.05	0.922918	\	0.930612	<0.05	2.15412	\	1.1343	<0.05	0.832446	\	0.839385	<0.05	0.526575	<0.05	0.386444	<0.05	0.389666	<0.05	0.733884	<0.05	0.740001	\	1.00834
Majonoside R1 isomer	<0.05	0.185156	<0.05	0.216374	<0.05	0.213358	<0.05	0.199342	<0.05	0.203585	<0.05	0.393885	<0.05	1.16861	<0.05	1.15232	<0.05	1.07662	<0.05	1.09953	<0.05	2.12732	\	0.986061	<0.05	0.921282	<0.05	0.940893	<0.05	1.82039	<0.05	0.934305	<0.05	0.954193	<0.05	1.84612	\	1.02129	<0.05	1.97593	<0.05	1.93475
Majonoside R2	<0.05	10.8256	<0.05	3.8289	<0.05	0.720095	<0.05	3.89677	<0.05	16.8493	<0.05	8.24128	<0.05	0.353691	<0.05	0.066518	<0.05	0.35996	<0.05	1.55643	<0.05	0.76128	<0.05	0.188068	\	1.01773	<0.05	4.40055	<0.05	2.15239	<0.05	5.41147	<0.05	23.3987	<0.05	11.4447	<0.05	4.32391	<0.05	2.1149	<0.05	0.489118
Malonyl-Ginsenoside Rb1	<0.05	0.873696	<0.05	0.571713	<0.05	0.24545	<0.05	0.137998	<0.05	0.0491757	<0.05	0.0135828	<0.05	0.654362	<0.05	0.280933	<0.05	0.157947	<0.05	0.0562847	<0.05	0.0155464	<0.05	0.429323	<0.05	0.241376	<0.05	0.0860146	<0.05	0.023758	<0.05	0.562224	<0.05	0.200349	<0.05	0.0553383	<0.05	0.356351	<0.05	0.0984274	<0.05	0.276209
Malonyl-Ginsenoside Rb1 isomer I	<0.05	0.656601	<0.05	0.223897	<0.05	0.0753351	<0.05	0.0405674	<0.05	0.0164098	<0.05	0.00787643	<0.05	0.340994	<0.05	0.114735	<0.05	0.061784	<0.05	0.024992	<0.05	0.0119958	<0.05	0.336472	<0.05	0.181188	<0.05	0.0732917	<0.05	0.0351788	<0.05	0.538493	<0.05	0.217824	<0.05	0.104552	<0.05	0.404506	<0.05	0.194157	<0.05	0.479984
Malonyl-Ginsenoside Rb1 isomer II	<0.05	0.848808	<0.05	0.25768	<0.05	0.0802188	<0.05	0.0421068	<0.05	0.0138807	<0.05	0.00457569	<0.05	0.303578	<0.05	0.0945075	<0.05	0.049607	<0.05	0.0163531	<0.05	0.00539072	<0.05	0.311312	<0.05	0.163408	<0.05	0.053868	<0.05	0.0177573	<0.05	0.5249	<0.05	0.173035	<0.05	0.0570401	<0.05	0.329654	<0.05	0.108669	<0.05	0.329644
Malonyl-Ginsenoside Rb2	<0.05	0.44109	<0.05	0.203658	<0.05	0.0497395	<0.05	0.0223264	<0.05	0.00600163	<0.05	0.00262594	<0.05	0.461716	<0.05	0.112765	<0.05	0.0506166	<0.05	0.0136064	<0.05	0.00595329	<0.05	0.24423	<0.05	0.109627	<0.05	0.0294691	<0.05	0.0128938	<0.05	0.448867	<0.05	0.120661	<0.05	0.0527938	<0.05	0.268813	<0.05	0.117615	<0.05	0.437537
Malonyl-Ginsenoside Rb3	<0.05	0.459735	<0.05	0.149805	<0.05	0.0587069	<0.05	0.0239183	<0.05	0.00646906	<0.05	0.00309145	<0.05	0.325851	<0.05	0.127697	<0.05	0.0520264	<0.05	0.0140713	<0.05	0.00672442	<0.05	0.39189	<0.05	0.159663	<0.05	0.0431833	<0.05	0.0206365	<0.05	0.407419	<0.05	0.110192	<0.05	0.052659	<0.05	0.270464	<0.05	0.12925	<0.05	0.477883
Malonyl-Ginsenoside Rd	<0.05	0.537606	<0.05	0.129745	<0.05	0.0866044	<0.05	0.0308156	<0.05	0.0153369	<0.05	0.00485586	<0.05	0.241339	<0.05	0.161093	<0.05	0.0573199	<0.05	0.0285282	<0.05	0.00903238	<0.05	0.667497	<0.05	0.237508	<0.05	0.118208	<0.05	0.0374262	<0.05	0.35582	<0.05	0.177092	<0.05	0.0560695	<0.05	0.497701	<0.05	0.157578	<0.05	0.316613
Malonyl-Ginsenoside Rd isomer I	<0.05	0.259673	<0.05	0.0590536	<0.05	0.032327	<0.05	0.011549	<0.05	0.00515045	<0.05	0.00180368	<0.05	0.227415	<0.05	0.124491	<0.05	0.0444749	<0.05	0.0198343	<0.05	0.00694596	<0.05	0.547419	<0.05	0.195567	<0.05	0.0872165	<0.05	0.0305431	<0.05	0.357254	<0.05	0.159323	<0.05	0.0557948	<0.05	0.445967	<0.05	0.156177	<0.05	0.350199
Malonyl-Ginsenoside Rd isomer II	<0.05	0.539755	<0.05	0.151643	<0.05	0.0663816	<0.05	0.0230334	<0.05	0.00889205	<0.05	0.00212242	<0.05	0.280948	<0.05	0.122985	<0.05	0.0426739	<0.05	0.0164742	<0.05	0.00393219	<0.05	0.437749	<0.05	0.151892	<0.05	0.058638	<0.05	0.0139961	<0.05	0.346985	<0.05	0.133954	<0.05	0.031973	<0.05	0.38605	<0.05	0.0921451	<0.05	0.238687
Malonyl-Ginsenoside Rd isomer III	\	2.46405	<0.05	0.543408	<0.05	0.297723	<0.05	0.109617	<0.05	0.055548	<0.05	0.023983	<0.05	0.220534	<0.05	0.120827	<0.05	0.0444866	<0.05	0.0225434	<0.05	0.00973317	<0.05	0.547882	<0.05	0.201722	<0.05	0.102222	<0.05	0.0441345	<0.05	0.368184	<0.05	0.186576	<0.05	0.0805547	<0.05	0.506746	<0.05	0.218789	<0.05	0.431753
Malonyl-Ginsenoside Re	<0.05	0.370522	<0.05	0.157291	<0.05	0.0787942	<0.05	0.0337785	<0.05	0.0134111	<0.05	0.00506539	<0.05	0.424512	<0.05	0.212657	<0.05	0.0911646	<0.05	0.0361952	<0.05	0.0136709	<0.05	0.500945	<0.05	0.214752	<0.05	0.0852631	<0.05	0.0322039	<0.05	0.428693	<0.05	0.170205	<0.05	0.0642863	<0.05	0.397031	<0.05	0.149959	<0.05	0.3777
Malonyl-Ginsenoside Rf	<0.05	0.0592048	<0.05	0.0237072	<0.05	0.00965547	<0.05	0.00262395	<0.05	0.000826921	<0.05	0.00048945	<0.05	0.400427	<0.05	0.163086	<0.05	0.0443199	<0.05	0.0139671	<0.05	0.00826708	<0.05	0.40728	<0.05	0.110682	<0.05	0.0348806	<0.05	0.0206456	<0.05	0.271758	<0.05	0.0856428	<0.05	0.0506915	<0.05	0.315144	<0.05	0.186532	<0.05	0.591895
Malonyl-Ginsenoside Rg2	\	0.989616	<0.05	0.839418	<0.05	0.665566	<0.05	0.430813	<0.05	0.257535	<0.05	0.149444	<0.05	0.848226	<0.05	0.672549	<0.05	0.435333	<0.05	0.260237	<0.05	0.151012	<0.05	0.792889	<0.05	0.513228	<0.05	0.306802	<0.05	0.178033	<0.05	0.647288	<0.05	0.386942	<0.05	0.224537	<0.05	0.597789	<0.05	0.346889	<0.05	0.580287
Malonyl-Ginsenoside Rg3	<0.05	5.05494	<0.05	3.35969	<0.05	1.89265	<0.05	1.1894	<0.05	0.518105	<0.05	0.194426	<0.05	0.664634	<0.05	0.374415	<0.05	0.235295	<0.05	0.102495	<0.05	0.0384625	<0.05	0.56334	<0.05	0.354022	<0.05	0.154212	<0.05	0.0578701	<0.05	0.628434	<0.05	0.273746	<0.05	0.102727	<0.05	0.4356	<0.05	0.163465	<0.05	0.375263
Malonyl-Ginsenoside Rg3 isomer I	<0.05	1.83822	<0.05	1.32932	<0.05	0.844592	<0.05	0.615187	<0.05	0.284758	<0.05	0.170344	<0.05	0.723156	<0.05	0.459461	<0.05	0.334664	<0.05	0.15491	<0.05	0.0926679	<0.05	0.635356	<0.05	0.462783	<0.05	0.214214	<0.05	0.128144	<0.05	0.728383	<0.05	0.337155	<0.05	0.201688	<0.05	0.462881	<0.05	0.276898	<0.05	0.598206
Malonyl-Ginsenoside Rg3 isomer II	<0.05	2.30301	<0.05	1.51663	<0.05	0.910199	<0.05	0.616316	<0.05	0.282419	<0.05	0.114764	<0.05	0.658542	<0.05	0.395221	<0.05	0.267613	<0.05	0.12263	<0.05	0.0498319	<0.05	0.600145	<0.05	0.406372	<0.05	0.186215	<0.05	0.0756701	<0.05	0.677122	<0.05	0.310282	<0.05	0.126086	<0.05	0.458237	<0.05	0.186209	<0.05	0.40636
Malonyl-Pseudoginsenoside F11	<0.05	0.333611	<0.05	0.136401	<0.05	0.0847496	<0.05	0.0376688	<0.05	0.0190756	<0.05	0.0121743	<0.05	0.408862	<0.05	0.254037	<0.05	0.112912	<0.05	0.0571791	<0.05	0.0364926	<0.05	0.621328	<0.05	0.276163	<0.05	0.139849	<0.05	0.0892542	<0.05	0.444472	<0.05	0.225082	<0.05	0.143651	<0.05	0.506402	<0.05	0.323194	<0.05	0.638216
Notoginsenoside B	<0.05	0.456074	<0.05	0.447453	<0.05	0.467022	<0.05	0.310589	<0.05	0.225379	<0.05	0.187456	\	0.981098	\	1.02401	<0.05	0.681006	<0.05	0.494173	<0.05	0.411021	\	1.04373	<0.05	0.694127	<0.05	0.503694	<0.05	0.41894	<0.05	0.665042	<0.05	0.482588	<0.05	0.401386	<0.05	0.725651	<0.05	0.60355	<0.05	0.831736
Notoginsenoside Fe	<0.05	0.179215	<0.05	0.177385	<0.05	0.401339	<0.05	0.227452	<0.05	0.161948	<0.05	0.178756	\	0.989788	<0.05	2.23943	<0.05	1.26916	\	0.903652	\	0.99744	<0.05	2.26253	<0.05	1.28225	\	0.912976	\	1.00773	<0.05	0.566733	<0.05	0.40352	<0.05	0.4454	<0.05	0.712011	<0.05	0.785908	\	1.10379
Notoginsenoside R2	<0.05	12.6385	<0.05	6.48797	<0.05	3.36831	<0.05	7.2577	<0.05	20.1987	<0.05	11.6957	<0.05	0.51335	<0.05	0.266512	<0.05	0.574253	<0.05	1.59819	<0.05	0.925399	<0.05	0.519162	<0.05	1.11864	<0.05	3.11325	<0.05	1.80267	<0.05	2.1547	<0.05	5.99669	<0.05	3.47226	<0.05	2.78307	<0.05	1.61148	<0.05	0.57903
Notoginsenoside ST11	<0.05	10.3078	<0.05	14.9217	<0.05	18.049	<0.05	40.0355	<0.05	46.6245	<0.05	57.4281	<0.05	1.44761	<0.05	1.751	<0.05	3.884	<0.05	4.52322	<0.05	5.57131	<0.05	1.20958	<0.05	2.68304	<0.05	3.12461	<0.05	3.84863	<0.05	2.21815	<0.05	2.58321	<0.05	3.18178	<0.05	1.16458	<0.05	1.43443	<0.05	1.23172
OA-O-glc	<0.05	7.66743	<0.05	11.9536	<0.05	20.6264	<0.05	26.0981	<0.05	38.7537	<0.05	36.2563	<0.05	1.559	<0.05	2.69014	<0.05	3.40376	<0.05	5.05432	<0.05	4.7286	<0.05	1.72555	<0.05	2.18329	<0.05	3.24202	<0.05	3.03309	<0.05	1.26528	<0.05	1.87884	<0.05	1.75776	<0.05	1.48492	<0.05	1.38923	\	0.935556
PPT-O-glc-xyl/ara	<0.05	0.172966	<0.05	0.197587	<0.05	0.277478	<0.05	0.188538	<0.05	0.194455	<0.05	0.337894	<0.05	1.14235	<0.05	1.60423	<0.05	1.09003	<0.05	1.12424	<0.05	1.95353	<0.05	1.40433	<0.05	0.954199	\	0.984148	<0.05	1.7101	<0.05	0.679469	<0.05	0.700795	<0.05	1.21773	<0.05	1.03139	<0.05	1.79219	<0.05	1.73765
PPT-O-rha-xyl/ara	<0.05	8.56428	<0.05	26.4323	<0.05	56.2737	<0.05	63.3819	<0.05	79.3252	<0.05	123.165	<0.05	3.08635	<0.05	6.57075	<0.05	7.40073	<0.05	9.26233	<0.05	14.3813	<0.05	2.12897	<0.05	2.39789	<0.05	3.00107	<0.05	4.65965	<0.05	1.12631	<0.05	1.40963	<0.05	2.18868	<0.05	1.25154	<0.05	1.94323	<0.05	1.55266
PQ-ginsenoside A isomer	<0.05	22.0055	<0.05	34.0328	<0.05	39.9044	<0.05	47.7144	<0.05	50.6184	<0.05	52.738	<0.05	1.54656	<0.05	1.81338	<0.05	2.16829	<0.05	2.30026	<0.05	2.39658	<0.05	1.17253	<0.05	1.40201	<0.05	1.48734	<0.05	1.54962	<0.05	1.19572	<0.05	1.26849	<0.05	1.32161	<0.05	1.06086	<0.05	1.10529	<0.05	1.04187
PQ-ginsenoside C	<0.05	9.50372	<0.05	11.7378	<0.05	12.5634	<0.05	12.6511	<0.05	12.4276	<0.05	12.4672	<0.05	1.23507	<0.05	1.32194	<0.05	1.33117	<0.05	1.30766	<0.05	1.31182	<0.05	1.07034	<0.05	1.07781	<0.05	1.05877	<0.05	1.06214	\	1.00698	\	0.989194	\	0.992343	\	0.982339	\	0.985466	\	1.00318
PQ-ginsenoside D	<0.05	52.8587	<0.05	62.7657	<0.05	64.5473	<0.05	61.8404	<0.05	60.6342	<0.05	57.6882	<0.05	1.18742	<0.05	1.22113	<0.05	1.16992	<0.05	1.1471	<0.05	1.09137	<0.05	1.02839	<0.05	0.985258	<0.05	0.96604	<0.05	0.919103	<0.05	0.958063	<0.05	0.939376	<0.05	0.893735	<0.05	0.980495	<0.05	0.932856	<0.05	0.951413
Presudoginsenoside FT2	<0.05	9.99793	<0.05	3.86699	<0.05	0.758954	<0.05	3.83655	<0.05	14.77	<0.05	7.70449	<0.05	0.386779	<0.05	0.0759111	<0.05	0.383734	<0.05	1.47731	<0.05	0.770608	<0.05	0.196265	\	0.992129	<0.05	3.81951	<0.05	1.99237	<0.05	5.05505	<0.05	19.461	<0.05	10.1514	<0.05	3.84982	<0.05	2.00818	<0.05	0.52163
Pseudoginsenoside Rt2	<0.05	16.586	<0.05	5.40954	\	1.02024	<0.05	5.62235	<0.05	26.8064	<0.05	11.9448	<0.05	0.326151	<0.05	0.0615124	<0.05	0.338982	<0.05	1.61621	<0.05	0.720173	<0.05	0.188601	\	1.03934	<0.05	4.9554	<0.05	2.20809	<0.05	5.5108	<0.05	26.2745	<0.05	11.7078	<0.05	4.76783	<0.05	2.12451	<0.05	0.445594
Pseudoginsenoside Rt4	<0.05	0.179223	<0.05	0.318286	<0.05	0.505038	<0.05	0.495675	<0.05	0.527933	<0.05	0.953204	<0.05	1.77592	<0.05	2.81794	<0.05	2.76569	<0.05	2.94568	<0.05	5.31854	<0.05	1.58674	<0.05	1.55733	<0.05	1.65868	<0.05	2.9948	<0.05	0.98146	<0.05	1.04533	<0.05	1.88739	<0.05	1.06508	<0.05	1.92304	<0.05	1.80554
Zingibroside R1	<0.05	4.33927	<0.05	8.26805	<0.05	12.1034	<0.05	10.957	<0.05	18.9456	<0.05	15.9333	<0.05	1.9054	<0.05	2.78927	<0.05	2.52508	<0.05	4.36608	<0.05	3.67188	<0.05	1.46388	<0.05	1.32522	<0.05	2.29142	<0.05	1.92709	<0.05	0.905283	<0.05	1.56531	<0.05	1.31643	<0.05	1.72908	<0.05	1.45416	<0.05	0.841002
(3β,12β)-20-(β-D-Glucopyranosyloxy)-12,25-dihydroxydammaran-3-yl 2-O-β-D-glucopyranosyl-β-D-glucopyranoside	<0.05	5.92158	<0.05	8.68304	<0.05	14.9762	<0.05	20.4437	<0.05	29.6639	<0.05	30.6565	<0.05	1.46634	<0.05	2.52908	<0.05	3.45241	<0.05	5.00945	<0.05	5.17707	<0.05	1.72476	<0.05	2.35444	<0.05	3.4163	<0.05	3.53062	<0.05	1.36508	<0.05	1.98074	<0.05	2.04702	<0.05	1.451	<0.05	1.49955	<0.05	1.03346
β-D-Glucopyranoside, (3β,12β)-3,12,24,25-tetrahydroxy-20-(D-xylopyranosyloxy)dammaran-6-yl (ACI)	<0.05	14.6492	<0.05	4.39816	<0.05	0.838808	<0.05	4.3453	<0.05	19.9968	<0.05	8.57756	<0.05	0.300231	<0.05	0.0572595	<0.05	0.296623	<0.05	1.36504	<0.05	0.58553	<0.05	0.190718	\	0.987983	<0.05	4.54662	<0.05	1.95026	<0.05	5.18033	<0.05	23.8395	<0.05	10.2259	<0.05	4.60193	<0.05	1.97399	<0.05	0.428948
β-D-Glucopyranoside, (3β,6α,12β)-20-(β-D-glucopyranosyloxy)-3,12,25-trihydroxydammaran-6-yl 2-O-(6-deoxy-α-L-mannopyranosyl)- (ACI)	<0.05	3.80395	<0.05	7.54211	<0.05	11.5585	<0.05	11.8577	<0.05	12.8857	<0.05	12.9483	<0.05	1.9827	<0.05	3.03856	<0.05	3.1172	<0.05	3.38745	<0.05	3.40392	<0.05	1.53253	<0.05	1.5722	<0.05	1.7085	<0.05	1.71681	<0.05	1.02588	<0.05	1.11482	<0.05	1.12024	<0.05	1.0867	<0.05	1.09198	\	1.00486
PPT-O-glcA	<0.05	0.611087	<0.05	0.595697	<0.05	0.58045	<0.05	0.441481	<0.05	0.329941	<0.05	0.151993	<0.05	0.974814	<0.05	0.949865	<0.05	0.722451	<0.05	0.539925	<0.05	0.412368	<0.05	0.974406	<0.05	0.741116	<0.05	0.553874	<0.05	0.423023	<0.05	0.760583	<0.05	0.568423	<0.05	0.434134	<0.05	0.747351	<0.05	0.570791	<0.05	0.763752
/ represents p≥ 0.05

## Sheet: Table S2
Table S2. The p and ratio of differential ginsenosides in the samples with different steaming temperature.
Compounds name	Freeze-dried/100 ℃		Freeze-dried/110 ℃		Freeze-dried/120 ℃		Freeze-dried/130 ℃		100 ℃/110 ℃		100 ℃/120 ℃		100 ℃/130 ℃		110 ℃/120 ℃		110 ℃/130 ℃		120 ℃/130 ℃
	p	Ratio	p	Ratio	p	Ratio	p	Ratio	p	Ratio	p	Ratio	p	Ratio	p	Ratio	p	Ratio	p	Ratio
		100 ℃/Freeze-dried		110 ℃/Freeze-dried		120 ℃/Freeze-dried		130 ℃/Freeze-dried		110 ℃/100 ℃		120 ℃/100 ℃		130 ℃/100 ℃		120 ℃/110 ℃		130 ℃/110 ℃		130 ℃/120 ℃
Ginsenoside Pk3	<0.05	647.969	<0.05	690.435	<0.05	1982.22	<0.05	4507.13	<0.05	1.06554	<0.05	3.05912	<0.05	6.95578	<0.05	2.87097	<0.05	6.52796	<0.05	2.27378
Ginsenoside Pk3 isomer	<0.05	442.754	<0.05	293.288	<0.05	471.479	<0.05	1078.35	<0.05	0.662416	<0.05	1.06488	<0.05	2.43556	<0.05	1.60756	<0.05	3.67677	<0.05	2.28717
Ginsenoside Re isomer	<0.05	1.02589	\	1.12883	<0.05	0.954262	<0.05	0.0796404	<0.05	1.10035	<0.05	0.930182	<0.05	0.0776307	<0.05	0.845353	<0.05	0.0705511	<0.05	0.0834576
Ginsenoside Re2	<0.05	1.09212	<0.05	0.711568	<0.05	0.284491	<0.05	0.0304851	<0.05	0.651548	<0.05	0.260495	<0.05	0.0279137	<0.05	0.399809	<0.05	0.0428422	<0.05	0.107157
Ginsenoside Re3	<0.05	4.10844	<0.05	0.912489	<0.05	0.344882	<0.05	0.0662199	<0.05	0.222101	<0.05	0.0839447	<0.05	0.016118	<0.05	0.377957	<0.05	0.0725706	<0.05	0.192008
Ginsenoside Rg1	<0.05	0.933019	<0.05	0.517074	<0.05	0.242144	<0.05	0.0170734	<0.05	0.554195	<0.05	0.259527	<0.05	0.0182991	<0.05	0.468295	<0.05	0.0330193	<0.05	0.0705096
Ginsenoside Rg2 isomer I	<0.05	1.02052	<0.05	4.43082	<0.05	20.545	<0.05	45.9941	<0.05	4.34171	<0.05	20.1318	<0.05	45.0691	<0.05	4.63683	<0.05	10.3805	<0.05	2.23871
Ginsenoside Rg2 isomer II	<0.05	4.23271	<0.05	29.8327	<0.05	139.028	<0.05	296.772	<0.05	7.04813	<0.05	32.8461	<0.05	70.114	<0.05	4.66026	<0.05	9.94788	<0.05	2.13462
Ginsenoside Rg3 isomer II	<0.05	7.50101	<0.05	12.3118	<0.05	22.2251	<0.05	16.7801	<0.05	1.64135	<0.05	2.96295	<0.05	2.23704	<0.05	1.80519	<0.05	1.36292	<0.05	0.755005
Ginsenoside Rg3 isomer III	<0.05	8.62069	<0.05	48.8893	<0.05	271.906	<0.05	713.722	<0.05	5.67116	<0.05	31.5411	<0.05	82.7918	<0.05	5.56166	<0.05	14.5987	<0.05	2.62489
Ginsenoside Rg5	<0.05	218.786	<0.05	514.195	<0.05	787.105	<0.05	909.556	<0.05	2.35022	<0.05	3.59761	<0.05	4.15729	<0.05	1.53075	<0.05	1.76889	<0.05	1.15557
Ginsenoside Rg5 isomer I	<0.05	19.1769	<0.05	64.5468	<0.05	185.214	<0.05	289.742	<0.05	3.36586	<0.05	9.65815	<0.05	15.1089	<0.05	2.86945	<0.05	4.48887	<0.05	1.56437
Ginsenoside Rg5 isomer II	<0.05	264.438	<0.05	563.7	<0.05	777.789	<0.05	831.268	<0.05	2.13169	<0.05	2.94129	<0.05	3.14353	<0.05	1.37979	<0.05	1.47466	<0.05	1.06876
Ginsenoside Rg6	<0.05	34.8708	<0.05	78.331	<0.05	112.647	<0.05	119.922	<0.05	2.24632	<0.05	3.23041	<0.05	3.43905	<0.05	1.43809	<0.05	1.53097	<0.05	1.06459
Ginsenoside Rg6 isomer I	<0.05	112.086	<0.05	556.461	<0.05	1035.76	<0.05	1198.46	<0.05	4.96461	<0.05	9.24077	<0.05	10.6924	<0.05	1.86133	<0.05	2.15372	<0.05	1.15709
Ginsenoside Rg6 isomer II	<0.05	62.5741	<0.05	179.243	<0.05	315.14	<0.05	374.288	<0.05	2.8645	<0.05	5.03627	<0.05	5.98152	<0.05	1.75817	<0.05	2.08816	<0.05	1.18769
Ginsenoside Rh1 isomer	<0.05	64.9549	<0.05	162.55	<0.05	917.777	<0.05	4190.18	<0.05	2.5025	<0.05	14.1294	<0.05	64.509	<0.05	5.64614	<0.05	25.7778	<0.05	4.56557
Ginsenoside Rh16	<0.05	58.909	<0.05	63.4899	<0.05	45.5866	<0.05	20.3794	<0.05	1.07776	<0.05	0.773848	<0.05	0.345947	<0.05	0.718013	<0.05	0.320986	<0.05	0.447048
Ginsenoside Rh4	<0.05	420.962	<0.05	424.359	<0.05	1103.01	<0.05	2219.47	<0.05	1.00807	<0.05	2.6202	<0.05	5.27239	<0.05	2.59923	<0.05	5.23018	<0.05	2.01221
Ginsenoside Rs4	<0.05	243.365	<0.05	1355.31	<0.05	5478.75	<0.05	9802.22	<0.05	5.56902	<0.05	22.5125	<0.05	40.2779	<0.05	4.04245	<0.05	7.23248	<0.05	1.78913
Gypenoside IX	<0.05	0.609099	<0.05	0.299866	<0.05	0.42391	<0.05	0.171204	<0.05	0.492311	<0.05	0.695962	<0.05	0.281077	<0.05	1.41366	<0.05	0.570935	<0.05	0.403869
Malonyl-Ginsenoside Rd isomer I	<0.05	0.00162129	<0.05	0.00218388	<0.05	0.00260643	<0.05	0.00174166	<0.05	1.347	<0.05	1.60763	<0.05	1.07425	<0.05	1.19349	<0.05	0.79751	<0.05	0.668219
20(R)-25-OH-Ginsenoside Rg3	<0.05	4.01973	<0.05	49.9835	<0.05	356.432	<0.05	972.962	<0.05	12.4345	<0.05	88.6706	<0.05	242.047	<0.05	7.131	<0.05	19.4657	<0.05	2.72973
20(R)-Ginsenoside Rg2	<0.05	21.8459	<0.05	43.5784	<0.05	59.3903	<0.05	59.3337	<0.05	1.9948	<0.05	2.7186	<0.05	2.71601	<0.05	1.36284	<0.05	1.36154	\	0.999048
20(R)-Ginsenoside Rh1	<0.05	203.031	<0.05	191.464	<0.05	465.347	<0.05	750.367	\	0.943031	<0.05	2.292	<0.05	3.69583	<0.05	2.43047	<0.05	3.9191	<0.05	1.61249
20(R)-Ginsenoside Rh12	<0.05	48.232	<0.05	178.759	<0.05	1365.77	<0.05	6912.38	<0.05	3.70623	<0.05	28.3166	<0.05	143.315	<0.05	7.64028	<0.05	38.6688	<0.05	5.06117
20(R)-Ginsenoside Rh2	<0.05	48.4397	<0.05	134.652	<0.05	727.32	<0.05	850.587	<0.05	2.77978	<0.05	15.015	<0.05	17.5597	<0.05	5.40149	<0.05	6.31694	<0.05	1.16948
20(R)-Gypenoside XIII	<0.05	3.96682	<0.05	4.51719	<0.05	4.62802	<0.05	5.45146	\	1.13874	\	1.16668	\	1.37426	\	1.02453	\	1.20683	\	1.17793
Quinquenoside L1	<0.05	1.5586	<0.05	0.574776	<0.05	0.446446	<0.05	0.165454	<0.05	0.368776	<0.05	0.28644	<0.05	0.106155	<0.05	0.776732	<0.05	0.287858	<0.05	0.370601
20(S)-25-OH-Ginsenoside Rg3	<0.05	5.10547	<0.05	75.7464	<0.05	613.617	<0.05	2994	<0.05	14.8363	<0.05	120.188	<0.05	586.431	<0.05	8.10093	<0.05	39.5267	<0.05	4.87927
20(S)-Ginsenoside Rh1	<0.05	8.92062	<0.05	5.04917	<0.05	8.43956	<0.05	14.566	<0.05	0.566011	<0.05	0.946072	<0.05	1.63285	<0.05	1.67147	<0.05	2.88484	<0.05	1.72592
20(S)-Ginsenoside Rh12	<0.05	10.0374	<0.05	26.8736	<0.05	141.871	<0.05	412.935	<0.05	2.67736	<0.05	14.1343	<0.05	41.1398	<0.05	5.27921	<0.05	15.3658	<0.05	2.91063
20(S)-Ginsenoside Rh2	<0.05	3.69569	<0.05	4.48592	<0.05	17.0065	<0.05	30.9446	<0.05	1.21383	<0.05	4.60172	<0.05	8.37318	<0.05	3.79108	<0.05	6.89817	<0.05	1.81958
20(S)-Gypenoside XIII	<0.05	0.665947	<0.05	1.5494	<0.05	4.1223	<0.05	6.15668	<0.05	2.32661	<0.05	6.19014	<0.05	9.245	<0.05	2.66058	<0.05	3.9736	<0.05	1.49351
20(S)-Quinquenoside L17	<0.05	0.726535	<0.05	0.505726	<0.05	0.105833	<0.05	0.0135576	<0.05	0.696079	<0.05	0.145668	<0.05	0.0186607	<0.05	0.209269	<0.05	0.0268083	<0.05	0.128104
24(R)-Pseudoginsenoside F11	<0.05	5.99403	<0.05	4.91692	<0.05	6.70389	<0.05	5.96722	<0.05	0.820303	\	1.11843	\	0.995528	\	1.36343	\	1.21361	\	0.890114
5,6-Didehydroginsenoside Rb1	<0.05	1.0112	<0.05	0.75818	<0.05	0.422753	<0.05	0.0391546	<0.05	0.749781	<0.05	0.41807	<0.05	0.0387209	<0.05	0.557589	<0.05	0.0516429	<0.05	0.0926182
Acetyl-20(R)-Ginsenoside Rg1	<0.05	1.02599	<0.05	0.176274	<0.05	0.103801	<0.05	0.00411813	<0.05	0.171809	<0.05	0.101172	<0.05	0.00401382	<0.05	0.588864	<0.05	0.0233622	<0.05	0.0396733
Acetyl-20(S)-Ginsenoside Rg1	<0.05	0.528735	<0.05	0.0919504	<0.05	0.0572431	<0.05	0.00482145	<0.05	0.173907	<0.05	0.108264	<0.05	0.00911884	<0.05	0.622543	<0.05	0.0524353	<0.05	0.0842276
Acetyl-Ginsenoside Rb1 isomer I	<0.05	5.49747	<0.05	5.37668	<0.05	3.48368	<0.05	0.743379	\	0.978027	<0.05	0.633688	<0.05	0.135222	<0.05	0.647924	<0.05	0.13826	<0.05	0.213389
Acetyl-Ginsenoside Rb2	<0.05	12.9876	<0.05	11.1907	<0.05	12.6094	<0.05	3.38906	<0.05	0.861647	\	0.970883	<0.05	0.260947	<0.05	1.12678	<0.05	0.302847	<0.05	0.268773
Acetyl-Ginsenoside Rb3	<0.05	0.612823	<0.05	0.259714	<0.05	0.308372	<0.05	0.144252	<0.05	0.423799	<0.05	0.503198	<0.05	0.235389	<0.05	1.18735	<0.05	0.555426	<0.05	0.467786
Acetyl-Ginsenoside Rc	<0.05	15.8519	<0.05	14.9419	<0.05	16.6732	<0.05	3.99083	\	0.942594	\	1.05181	<0.05	0.251757	<0.05	1.11587	<0.05	0.267089	<0.05	0.239356
Acetyl-Ginsenoside Rd isomer I	<0.05	0.904466	<0.05	0.196589	<0.05	0.292747	<0.05	0.0440197	<0.05	0.217354	<0.05	0.323668	<0.05	0.0486693	\	1.48913	<0.05	0.223917	<0.05	0.150368
Acetyl-Ginsenoside Re	<0.05	6.03425	<0.05	7.05711	<0.05	4.62	<0.05	0.292812	<0.05	1.16951	<0.05	0.765629	<0.05	0.048525	<0.05	0.654659	<0.05	0.0414918	<0.05	0.0633792
Acetyl-Ginsenoside Re isomer	<0.05	1.37895	<0.05	0.689025	<0.05	0.51776	<0.05	0.0310533	<0.05	0.499673	<0.05	0.375474	<0.05	0.0225195	<0.05	0.751438	<0.05	0.0450685	<0.05	0.0599764
Acetyl-Ginsenoside Rg3	<0.05	0.813389	<0.05	2.66067	<0.05	8.74579	<0.05	14.3466	<0.05	3.27108	<0.05	10.7523	<0.05	17.638	<0.05	3.28707	<0.05	5.3921	<0.05	1.6404
Acetyl-PPD-O-glc/O-glc	<0.05	4.77943	<0.05	1.55329	<0.05	0.0229465	<0.05	0.00103312	<0.05	0.324994	<0.05	0.00480109	<0.05	0.000216159	<0.05	0.0147729	<0.05	0.000665115	<0.05	0.0450228
Acetyl-PQ-ginsenoside A	<0.05	30.6169	<0.05	113.822	<0.05	188.657	<0.05	196.22	<0.05	3.71764	<0.05	6.16186	<0.05	6.40888	<0.05	1.65747	<0.05	1.72391	<0.05	1.04009
Acetyl-PQ-ginsenoside D	<0.05	88.4174	<0.05	215.007	<0.05	103.006	<0.05	91.0735	<0.05	2.43173	<0.05	1.165	\	1.03004	<0.05	0.479083	<0.05	0.423584	\	0.884157
PPT-O-glc	<0.05	63.1936	<0.05	196.876	<0.05	115.522	<0.05	114.862	<0.05	3.11544	<0.05	1.82806	<0.05	1.81762	<0.05	0.586775	<0.05	0.583425	\	0.994291
Dammarane-3,6,12,24,25-pentol, 20-(β-D-glucopyranosyloxy)-, (3β,6β,12β)-(ACI)	<0.05	88.4174	<0.05	215.007	<0.05	103.006	<0.05	91.0735	<0.05	2.43173	<0.05	1.165	<0.05	1.03004	<0.05	0.479083	<0.05	0.423584	\	0.884157
Chikusetsusaponin Iva	<0.05	0.11415	<0.05	0.335644	<0.05	0.534946	\	1.02933	<0.05	2.94037	<0.05	4.68633	<0.05	9.01729	<0.05	1.59379	<0.05	3.06672	<0.05	1.92417
Chikusetsusaponin Iva isomer I	<0.05	0.1298	<0.05	0.281599	<0.05	0.62547	<0.05	1.4992	<0.05	2.16949	<0.05	4.81873	<0.05	11.5501	<0.05	2.22113	<0.05	5.32386	<0.05	2.39691
Chikusetsusaponin L10	<0.05	15.1235	<0.05	35.1156	<0.05	228.247	<0.05	1303.32	<0.05	2.32192	<0.05	15.0922	<0.05	86.1786	<0.05	6.49986	<0.05	37.1153	<0.05	5.71016
Cyclofoetoside A	<0.05	0.680763	<0.05	0.479499	<0.05	0.188398	<0.05	0.0114107	<0.05	0.704356	<0.05	0.276746	<0.05	0.0167616	<0.05	0.392906	<0.05	0.023797	<0.05	0.0605667
Cyclofoetoside A isomer	<0.05	0.782214	<0.05	0.664836	<0.05	0.244464	<0.05	0.010307	<0.05	0.849941	<0.05	0.312529	<0.05	0.0131767	<0.05	0.367706	<0.05	0.0155031	<0.05	0.0421615
Floralginsenoside P	<0.05	1.59377	<0.05	0.736848	<0.05	0.240495	<0.05	0.00843175	<0.05	0.462329	<0.05	0.150897	<0.05	0.00529042	<0.05	0.326384	<0.05	0.011443	<0.05	0.0350599
Floralginsenoside Tb	<0.05	115.48	<0.05	261.659	<0.05	362.616	<0.05	468.364	<0.05	2.26585	<0.05	3.14009	<0.05	4.05582	<0.05	1.38583	<0.05	1.78998	<0.05	1.29163
Floralquinquenoside E	<0.05	0.782215	<0.05	0.405031	<0.05	0.0800631	<0.05	0.00388047	<0.05	0.5178	<0.05	0.102354	<0.05	0.00496087	<0.05	0.197672	<0.05	0.00958068	<0.05	0.0484676
Koryoginsenoside R2	<0.05	0.81592	<0.05	0.626832	<0.05	0.105829	<0.05	0.0113127	<0.05	0.768253	<0.05	0.129705	<0.05	0.013865	<0.05	0.168831	<0.05	0.0180474	<0.05	0.106896
Majoroside F6	<0.05	0.955782	<0.05	0.447903	<0.05	0.279931	<0.05	0.14507	<0.05	0.468625	<0.05	0.292882	<0.05	0.151782	<0.05	0.624981	<0.05	0.323887	<0.05	0.518235
Malonyl-Ginsenoside Rb1	<0.05	0.515591	<0.05	0.121771	<0.05	0.00355776	<0.05	0.00576204	<0.05	0.236177	<0.05	0.00690036	<0.05	0.0111756	<0.05	0.0292169	<0.05	0.0473187	<0.05	1.61957
Malonyl-Ginsenoside Rb1 isomer I	<0.05	0.529764	<0.05	0.0649279	<0.05	0.00955612	<0.05	0.00349854	<0.05	0.12256	<0.05	0.0180385	<0.05	0.00660396	<0.05	0.14718	<0.05	0.0538834	<0.05	0.366104
Malonyl-Ginsenoside Rb2	<0.05	0.0567315	<0.05	0.00416277	<0.05	0.000262036	<0.05	0.000290457	<0.05	0.0733767	<0.05	0.00461889	<0.05	0.00511985	<0.05	0.0629476	<0.05	0.0697748	\	1.10846
Malonyl-Ginsenoside Rb2 isomer	<0.05	0.0567315	<0.05	0.00416277	<0.05	0.000262036	<0.05	0.000290457	<0.05	0.0733767	<0.05	0.00461889	<0.05	0.00511985	<0.05	0.0629476	<0.05	0.0697748	\	1.10846
Malonyl-Ginsenoside Rb3	<0.05	0.299333	<0.05	0.0129638	<0.05	0.00196055	<0.05	0.0017427	<0.05	0.043309	<0.05	0.00654974	<0.05	0.00582192	<0.05	0.151233	<0.05	0.134428	\	0.888879
Malonyl-Ginsenoside Rc	<0.05	0.778439	<0.05	0.0734709	<0.05	0.00441108	<0.05	0.00450307	<0.05	0.0943824	<0.05	0.00566657	<0.05	0.00578474	<0.05	0.0600384	<0.05	0.0612905	\	1.02085
Malonyl-Ginsenoside Rd	<0.05	0.511884	<0.05	0.0335946	<0.05	0.00329401	<0.05	0.00258047	<0.05	0.0656294	<0.05	0.00643508	<0.05	0.00504113	<0.05	0.0980518	<0.05	0.076812	<0.05	0.783382
Malonyl-Ginsenoside Rd isomer II	<0.05	0.511884	<0.05	0.0335946	<0.05	0.00329401	<0.05	0.00258047	<0.05	0.0656294	<0.05	0.00643508	<0.05	0.00504113	<0.05	0.0980518	<0.05	0.076812	<0.05	0.783382
Malonyl-Ginsenoside Re	<0.05	0.30614	<0.05	0.0385821	<0.05	0.00185927	<0.05	0.00109455	<0.05	0.126028	<0.05	0.00607326	<0.05	0.00357532	<0.05	0.0481899	<0.05	0.0283693	<0.05	0.588699
Malonyl-Ginsenoside Re isomer III	<0.05	0.876034	<0.05	0.484402	<0.05	0.0757006	<0.05	0.00742632	<0.05	0.552949	<0.05	0.0864129	<0.05	0.00847721	<0.05	0.156276	<0.05	0.0153309	<0.05	0.0981011
Malonyl-Ginsenoside Rf	<0.05	0.176438	<0.05	0.00334338	<0.05	0.000401786	<0.05	0.000597784	<0.05	0.0189493	<0.05	0.0022772	<0.05	0.00338807	<0.05	0.120174	<0.05	0.178796	<0.05	1.48782
Malonyl-Ginsenoside Rg2	<0.05	1.0215	<0.05	0.47857	<0.05	0.0914929	<0.05	0.0528485	<0.05	0.468499	<0.05	0.0895675	<0.05	0.0517364	<0.05	0.19118	<0.05	0.11043	<0.05	0.577625
Malonyl-Ginsenoside Rg3	<0.05	5.27678	<0.05	1.66312	<0.05	0.130138	<0.05	0.111786	<0.05	0.315178	<0.05	0.0246624	<0.05	0.0211845	<0.05	0.0782491	<0.05	0.0672146	<0.05	0.858982
Malonyl-Ginsenoside Rg3 isomer I	<0.05	2.53237	<0.05	1.03138	<0.05	0.187287	<0.05	0.147516	<0.05	0.40728	<0.05	0.0739574	<0.05	0.0582521	<0.05	0.181589	<0.05	0.143027	<0.05	0.787645
Malonyl-Ginsenoside Rg3 isomer II	<0.05	6.05187	<0.05	2.28286	<0.05	0.332068	<0.05	0.421485	<0.05	0.377216	<0.05	0.0548703	<0.05	0.0696454	<0.05	0.145461	<0.05	0.18463	\	1.26927
Malonyl-Pseudoginsenoside F11	<0.05	0.279151	<0.05	0.0413292	<0.05	0.00857995	<0.05	0.00405958	<0.05	0.148053	<0.05	0.0307358	<0.05	0.0145426	<0.05	0.2076	<0.05	0.0982254	<0.05	0.473147
Notoginsenoside A	<0.05	0.766465	<0.05	0.455492	<0.05	0.124431	<0.05	0.00252843	<0.05	0.594276	<0.05	0.162344	<0.05	0.00329882	<0.05	0.273179	<0.05	0.00555099	<0.05	0.02032
Notoginsenoside I	<0.05	2.17419	\	1.30466	<0.05	0.92662	<0.05	0.173678	<0.05	0.600067	<0.05	0.42619	<0.05	0.0798814	<0.05	0.710237	<0.05	0.133121	<0.05	0.187432
Notoginsenoside ST11 isomer	<0.05	5.05486	<0.05	17.9205	<0.05	62.449	<0.05	99.5609	<0.05	3.54521	<0.05	12.3543	<0.05	19.6961	<0.05	3.48478	<0.05	5.55569	<0.05	1.59427
OA-O-glc	<0.05	11.6785	<0.05	38.4974	<0.05	101.035	<0.05	336.089	<0.05	3.29644	<0.05	8.65141	<0.05	28.7786	<0.05	2.62447	<0.05	8.73019	<0.05	3.32646
OT-O-glc-rha-/O-xyl/ara	<0.05	0.741277	<0.05	0.329659	<0.05	0.0877581	<0.05	0.0264587	<0.05	0.444718	<0.05	0.118388	<0.05	0.0356934	<0.05	0.266209	<0.05	0.0802608	<0.05	0.301496
PPD-O-glc-glc/O-glc-rha	<0.05	0.734179	<0.05	0.555142	<0.05	0.272832	<0.05	0.126478	\	2.38269	<0.05	4.54979	<0.05	11.3856	<0.05	12.9716	\	1.45967	<0.05	0.696485
PPD-O-glc-glc/O-rha	<0.05	2.376	<0.05	1.85705	<0.05	1.3479	<0.05	0.446058	<0.05	0.781587	<0.05	0.567301	<0.05	0.187735	<0.05	0.725832	<0.05	0.240197	<0.05	0.330927
PPT-O-glc-rha/O-rha	<0.05	0.546897	<0.05	0.36027	<0.05	0.131486	<0.05	0.0260808	<0.05	0.658753	<0.05	0.240422	<0.05	0.0476886	<0.05	0.364965	<0.05	0.0723923	<0.05	0.198354
PPT-O-rha-xyl/ara	<0.05	9.44104	<0.05	48.9229	<0.05	152.852	<0.05	217.106	<0.05	5.18195	<0.05	16.1902	<0.05	22.996	<0.05	3.12434	<0.05	4.43772	<0.05	1.42037
PPT-O-xyl/ara/O-glc	<0.05	0.618857	<0.05	0.261162	<0.05	0.0915302	<0.05	0.00832002	<0.05	0.422007	<0.05	0.147902	<0.05	0.0134442	<0.05	0.350473	<0.05	0.0318577	<0.05	0.0908992
PQ-ginsenoside A	<0.05	24.8756	<0.05	29.7139	<0.05	26.5122	<0.05	26.514	\	1.1945	\	1.06579	\	1.06586	<0.05	0.892248	<0.05	0.892309	\	1.00007
PQ-ginsenoside A isomer	<0.05	105.861	<0.05	243.539	<0.05	274.965	<0.05	265.758	\	2.30056	\	2.59742	\	2.51044	\	1.12904	\	1.09123	\	0.966515
PQ-ginsenoside C	<0.05	12.9017	<0.05	18.3739	<0.05	15.9716	<0.05	14.4479	<0.05	1.42414	<0.05	1.23795	\	1.11985	<0.05	0.869256	<0.05	0.786332	<0.05	0.904603
PQ-ginsenoside D	<0.05	537.658	<0.05	580.304	<0.05	360.269	<0.05	309.459	<0.05	1.07932	<0.05	0.670071	<0.05	0.575569	<0.05	0.620827	<0.05	0.53327	<0.05	0.858967
Presudoginsenoside FT2	<0.05	0.655478	<0.05	14.0158	<0.05	8.32091	<0.05	0.69558	<0.05	21.3826	<0.05	12.6944	<0.05	1.06118	<0.05	0.593679	<0.05	0.0496281	<0.05	0.0835942
Pseudoginsenoside F11 isomer III	<0.05	0.552476	<0.05	0.1482	<0.05	0.255924	<0.05	0.216323	<0.05	0.268247	<0.05	0.46323	<0.05	0.391551	<0.05	1.72688	<0.05	1.58633	<0.05	0.845263
Pseudoginsenoside Rt2	<0.05	0.770134	<0.05	26.105	<0.05	10.1944	<0.05	0.810582	<0.05	33.8968	<0.05	13.2371	\	1.05252	<0.05	0.390513	<0.05	0.0310508	<0.05	0.0795128
Pseudoginsenoside Rt4	<0.05	1.69128	<0.05	0.454357	<0.05	1.37467	<0.05	4.0749	<0.05	0.268647	<0.05	0.812796	<0.05	10.4094	<0.05	3.02552	<0.05	8.96851	<0.05	2.96429
Quinquenoside L3	<0.05	1.08827	<0.05	0.664613	<0.05	0.339356	<0.05	0.0586581	<0.05	0.610708	<0.05	0.311832	<0.05	0.0539005	<0.05	0.510607	<0.05	0.088259	<0.05	0.172851
Saponin Ia	<0.05	0.743602	<0.05	0.358254	<0.05	0.485912	<0.05	0.175181	<0.05	0.481782	<0.05	0.653457	<0.05	0.235585	<0.05	1.35633	<0.05	0.488986	<0.05	0.360521
Vinaginsenoside R13 isomer	<0.05	1.81355	<0.05	1.34712	<0.05	0.608287	<0.05	0.107482	<0.05	0.742808	<0.05	0.335411	<0.05	0.059266	<0.05	0.451545	<0.05	0.0797864	<0.05	0.176696
Vinaginsenoside R20	<0.05	1.66521	<0.05	0.718425	<0.05	0.522142	<0.05	0.229501	<0.05	0.431432	<0.05	0.313559	<0.05	0.137821	<0.05	0.726787	<0.05	0.31945	<0.05	0.439537
Zingibroside R1	<0.05	6.45156	<0.05	15.0405	<0.05	15.5203	<0.05	24.3514	<0.05	2.3313	<0.05	2.40567	<0.05	3.7745	\	1.0319	<0.05	1.61905	<0.05	1.56901
Dammarane-3,6,12,24,25-pentol, 20-(β-D-glucopyranosyloxy)-, (3β,6β,12β)-(ACI) isomer	<0.05	0.940984	<0.05	0.148383	<0.05	0.307896	<0.05	0.299799	<0.05	0.157689	<0.05	0.327206	<0.05	0.318601	<0.05	2.07502	<0.05	2.02045	<0.05	0.973702
(3β,12β)-20-(β-D-Glucopyranosyloxy)-3,12,24,25-tetrahydroxydammaran-6-yl 2-O-(6-deoxy-α-L-β-D-mannopyranosyl)-β-D-glucopyranoside	<0.05	1.0613	<0.05	0.627279	<0.05	0.110239	<0.05	0.0260882	<0.05	0.591049	<0.05	0.103872	<0.05	0.0245813	<0.05	0.175742	<0.05	0.0415894	<0.05	0.23665
β-D-Glucopyranoside, (3β,12β)-3,12,24,25-tetrahydroxy-20-(D-xylopyranosyloxy)dammaran-6-yl (ACI)	<0.05	0.760849	<0.05	17.4471	<0.05	6.54943	<0.05	0.472236	<0.05	22.9311	<0.05	8.60806	<0.05	0.62067	<0.05	0.375387	<0.05	0.0270667	<0.05	0.0721034
/ represents p≥ 0.05
